# Supplementary material
Source: Research Square preprint supplement (doi:10.21203/rs.3.rs-10079461/v1)
Supplement: Supplementary file 1 [file fefe6f679752cca8bb07cf67.docx]

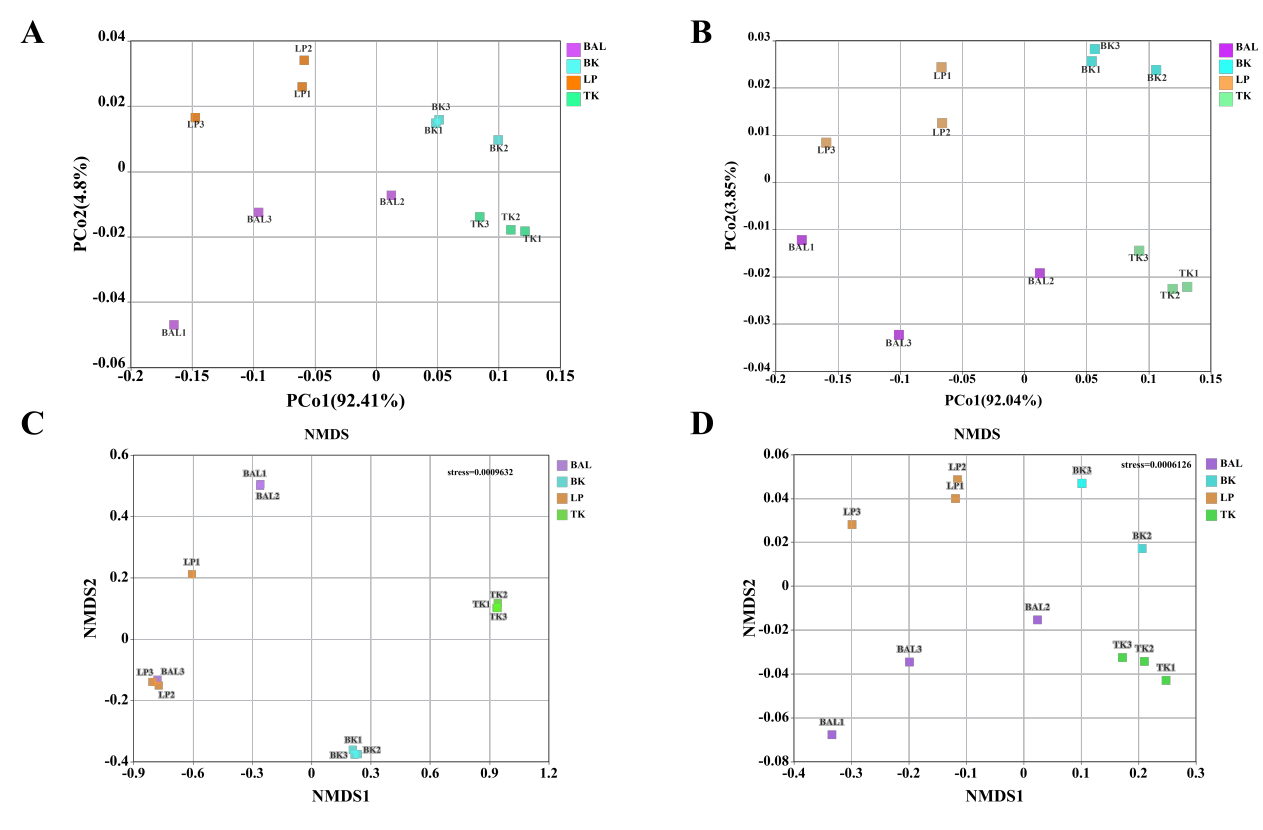


**Fig. S1.** Analysis of beta-diversity using PCoA , NMDS and the microbial community structures in lychee water kefir microbial communities before and after fermentation and under different fermentation methods. PCoA at the genus level(A). PCoA at the species level(B). NMDS at the genus level(C). NMDS at the species level(D).


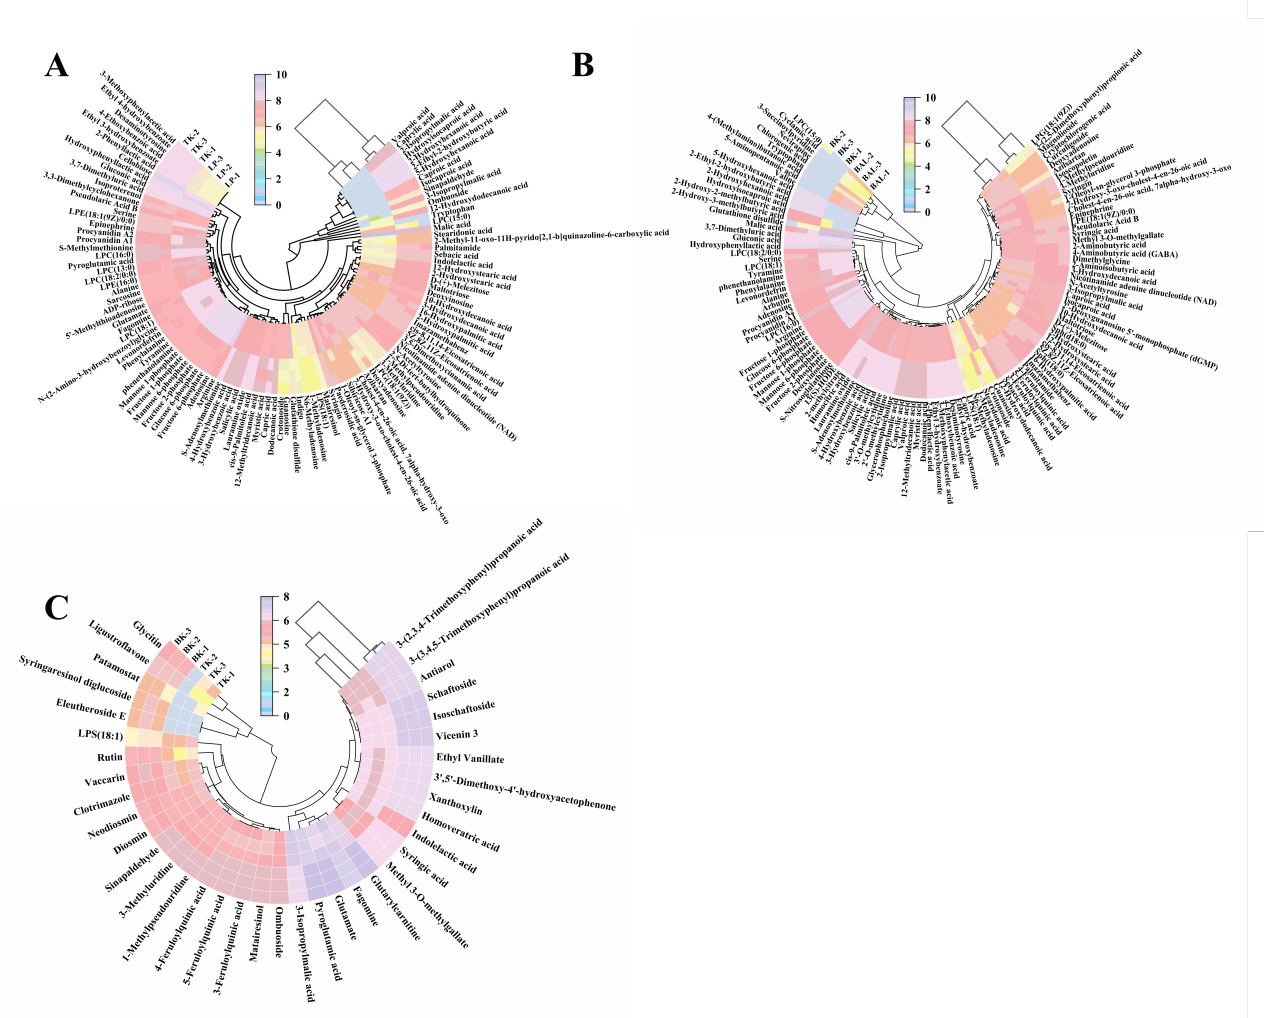


**Fig. S2.** Heat map clustering of significant differential metabolites in LP and TK(A) . Heat map clustering of significant differential metabolites in BAL and BK(B). Heat map clustering of significant differential metabolites in TK and BK(C).

| Genus level | Unfermentation | | Fermentation | |
| --- | --- | --- | --- | --- |
| LP | BAL | TK | BK |
| ACE | 260.00 ± 11.20a | 241.66 ± 20.94a | 107.62 ± 5.00c | 131.46 ± 5.84b |
| Chao1 | 260.01 ± 10.61a | 242.11 ± 20.83a | 109.08 ± 7.80b | 130.67 ± 5.94b |
| Shannon | 2.15 ± 0.20a | 1.95 ± 0.30a | 1.12 ± 0.03c | 1.48 ± 0.10b |
| Simpson | 0.62 ± 0.04a | 0.59 ± 0.09a | 0.37 ± 0.02b | 0.48 ± 0.04b |
| Observed species | 257.67 ± 0.04a | 239.67 ± 0.09a | 103.67 ± 0.02c | 129 ± 0.04b |
| Goods coverage | 0.99 ± 0.00a | 0.99 ± 0.00a | 0.99 ± 0.00a | 0.99 ± 0.00a |

**Table S1.** Changes in microbial alpha diversity of lychee water kefir before and after fermentation at genus level

a. Different letters (a, b, c, and d) in the same row indicates significant differences (p < 0.05).

**Table S2.** Changes in microbial alpha diversity of lychee water kefir before and after fermentation at species level.

| Species level | Unfermentation | | | | Fermentation | | | | |
| --- | --- | --- | --- | --- | --- | --- | --- | --- | --- |
| LP | | | BAL | TK | | BK | | |
| ACE | | 564.65 ± 17.38a | 537.61 ± 83.93a | | | 253.07 ± 15.27b | | 303.85 ± 7.27b |
| chao1 | | 565.07 ± 17.42a | 536.2 ± 84.4a | | | 253.05 ± 16.75b | | 305.71 ± 6.55b |
| Shannon | | 2.45 ± 0.30a | 2.18 ± 0.37a | | | 1.22 ± 0.04b | | 1.55 ± 0.11b |
| Simpson | | 0.60 ± 0.06a | 0.56 ± 0.10a | | | 0.34 ± 0.02b | | 0.43 ± 0.04b |
| Observed species | | 561.00 ± 0.06a | 532.67 ± 0.10a | | | 248.33 ± 0.02b | | 296.67 ± 0.04b |
| Goods coverage | | 0.99 ± 0.00a | 0.99 ± 0.00a | | | 0.99 ± 0.00a | | 0.99 ± 0.00a |

a. Different letters (a, b, c, d,) in the same row indicates significant differences (p < 0.05).
